# Supplementary material
Source: publisher figshare collection journal article supplement (https://gsajournals.figshare.com/articles/dataset/_/22233817)
Supplement: Supplementary file 1 [file 1]

## SUPPLEMENTAL INFORMATION

### **Distinct *Wolbachia* localization patterns in oocytes of diverse host species reveal multiple strategies of maternal transmission**

Yonah A. Radousky<sup>1,\*</sup>, Michael T.J. Hague<sup>2,\*†</sup>, Sommer Fowler<sup>1</sup>, Eliza Paneru<sup>1</sup>, Adan Codina<sup>1</sup>, Cecilia Rugamas<sup>1</sup>, Grant Hartzog<sup>1</sup>, Brandon S. Cooper<sup>2</sup>, William Sullivan<sup>1</sup>

<sup>1</sup>Department of Molecular, Cell, and Developmental Biology, University of California Santa Cruz, Santa Cruz, California, United States of America

<sup>2</sup>Division of Biological Sciences, University of Montana, Missoula, Montana, United States of America

\*Co-first authors

†Corresponding Author:

Michael T.J. Hague

Division of Biological Sciences, University of Montana  
32 Campus Dr. HS 104, Missoula, MT 59812

[michael.hague@mso.umt.edu](mailto:michael.hague@mso.umt.edu)

**Supplemental Figure 1.** (A) Estimated Bayesian phylogram of host species based on 20 nuclear loci. All nodes have posterior probabilities >0.95. (B) Bayesian phylogram estimated using similar methods, but with a constrained topology to account for previously resolved relationships among subgroups within the *melanogaster* species group ((*montium*, *melanogaster*) *ananassae*) based on Turelli et al., (2018) and Suvorov et al., (2022). (C) Mean estimates of *Wolbachia* abundance (log-transformed CTCF) in the whole oocyte, posterior region, and the posterior cortex. For *D. simulans*, the mean values include both wRi- and wHa-infected individuals.

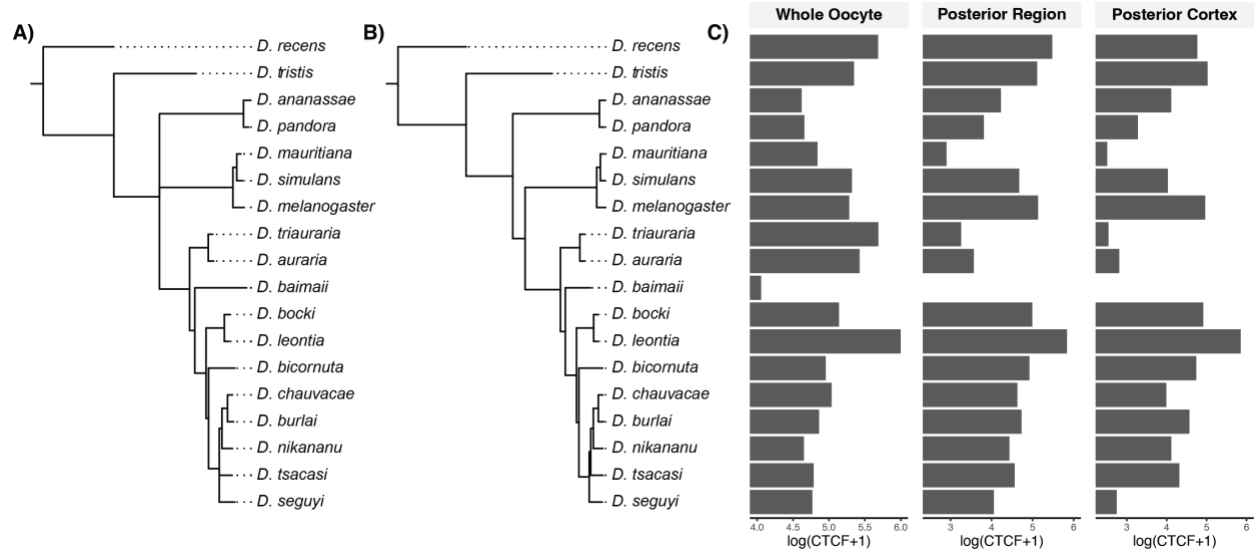

**Supplemental Figure 2.** Illustrations of the homology models for the *Wolbachia* surface proteins WD\_1085 and WD\_0501.

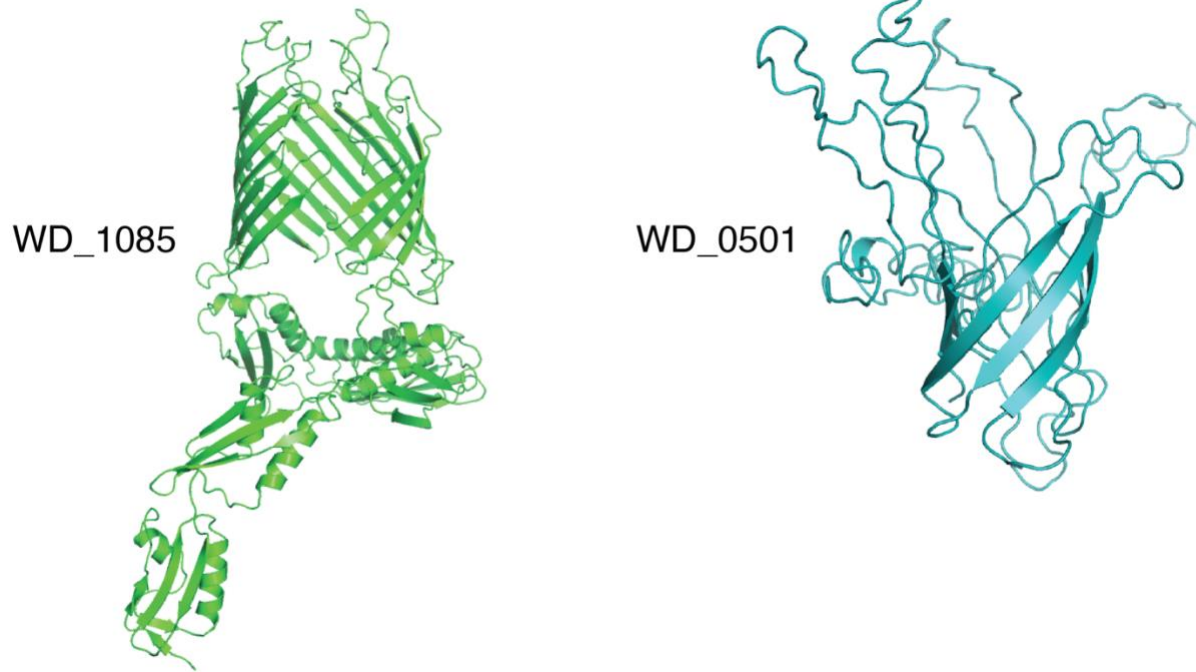

**Supplemental Figure 3.** (A) Representative image of the reduction of *w*Mel *Wolbachia* titer between stages 4/5 and 6 in *D. melanogaster* oogenesis. *Wolbachia* stained with anti-FtsZ shown in pink. Scale bars set at 25  $\mu$ M. (B) Greyscale DAPI channel. (C) Greyscale of anti-FtsZ channel. (A'-C') 5X zoom around the nucleus of the oocyte during stage 4 shown for each channel. (A''-C'') 4X zoom around the nucleus during stage 6 for each respective channel seen above. At least 10 oocytes across 3 slides were imaged with Z-stacks for a visual description of this trend.

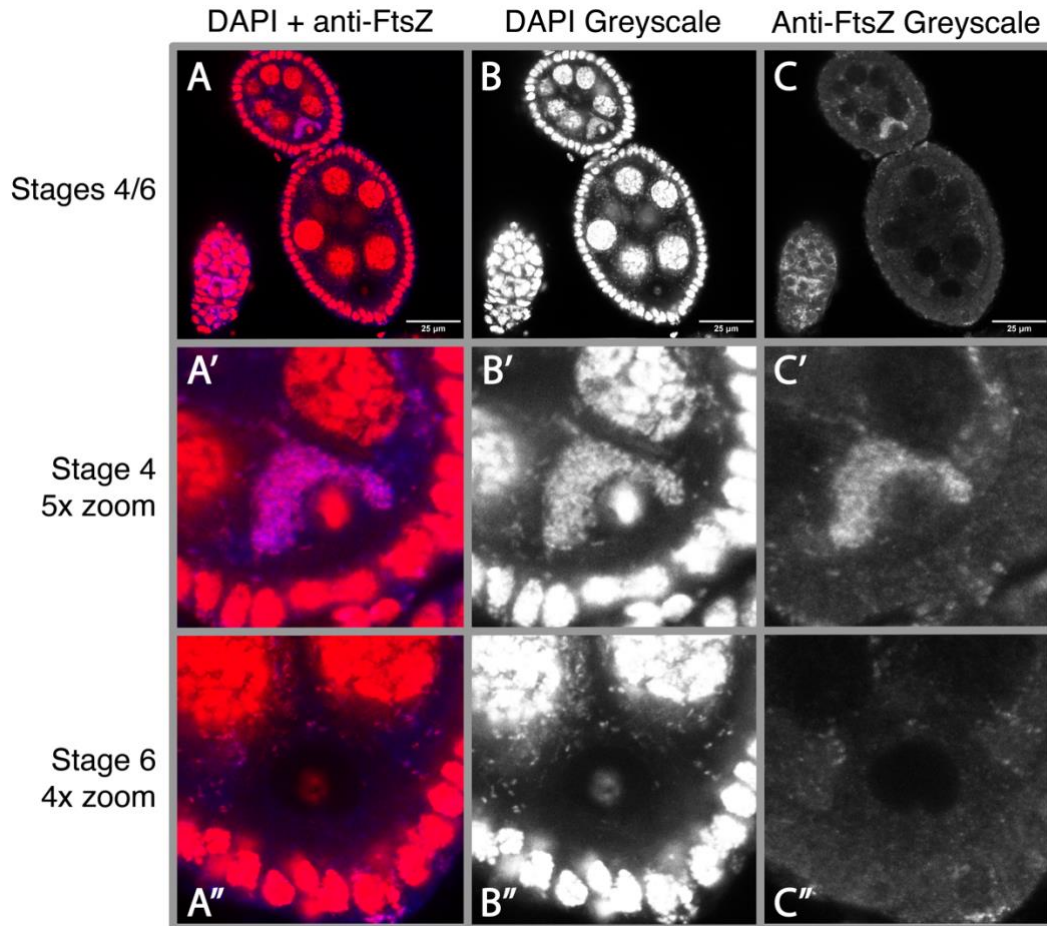

**Supplemental Figure 4.** Bayesian phylograms depicting the evolutionary relationships among *Wolbachia* strains diverged up to 46 million years (left) and *Drosophila* host species diverged up to 50 million years (right). *wMel*- and *wRi*-like clades of closely related *Wolbachia* are labeled on the left. Grey lines pair *Wolbachia* strains with their *Drosophila* host species, which highlights patterns of topological discordance due to introgressive and horizontal transfer of *Wolbachia* among host species. The *Wolbachia* phylogram was estimated using 66 full-length and single-copy genes (43,275 bp) of equal length. All nodes have posterior probabilities >0.95. The host phylogram was estimated using 20 conserved single-copy genes (see Materials and Methods regarding host tree topology). *Wolbachia* and host divergence times in millions of years (MYA) are reproduced from Meany et al. (2019) and Suvorov et al. (2022), respectively.

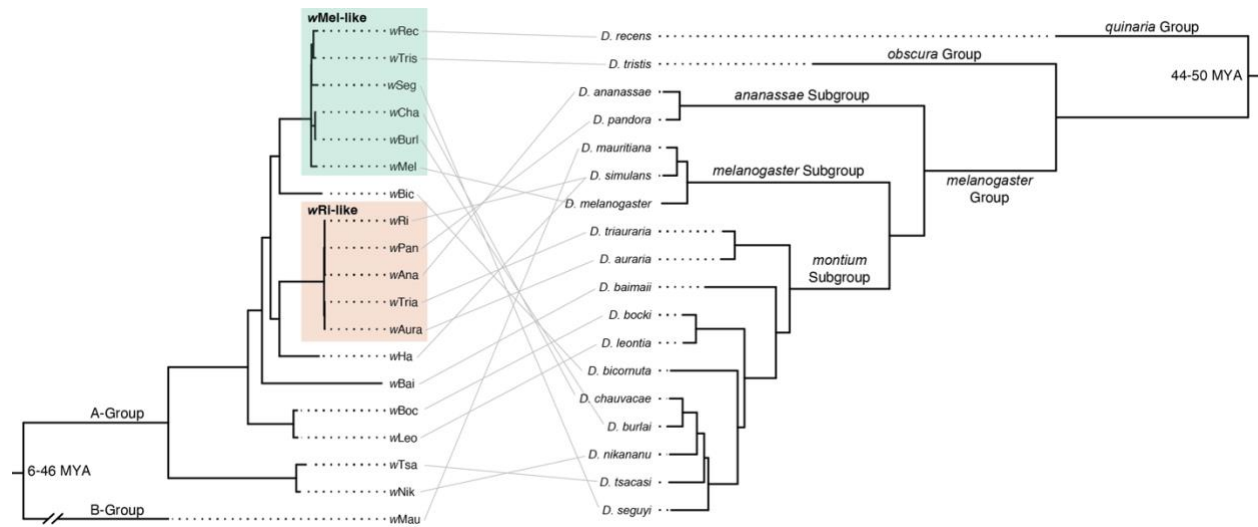

**Supplemental Figure 5.** Representative images of *Wolbachia* posterior localization patterns. Confocal micrographs of *Drosophila* oocytes DNA-stained with PI (red) and actin-stained with phalloidin (green) show representative examples of infected *Drosophila* species with different *Wolbachia* localization classes. Second columns depict single greyscale channel images of PI staining. Third columns depict an enlarged PI-stained image of the posterior region of each oocyte. Panels A, B and C are grouped into *Wolbachia* strains that exhibit a Posteriorly Localized, Posteriorly Clumped, or Dispersed localization pattern respectively. Scale bar set at 25  $\mu$ M.

**A**

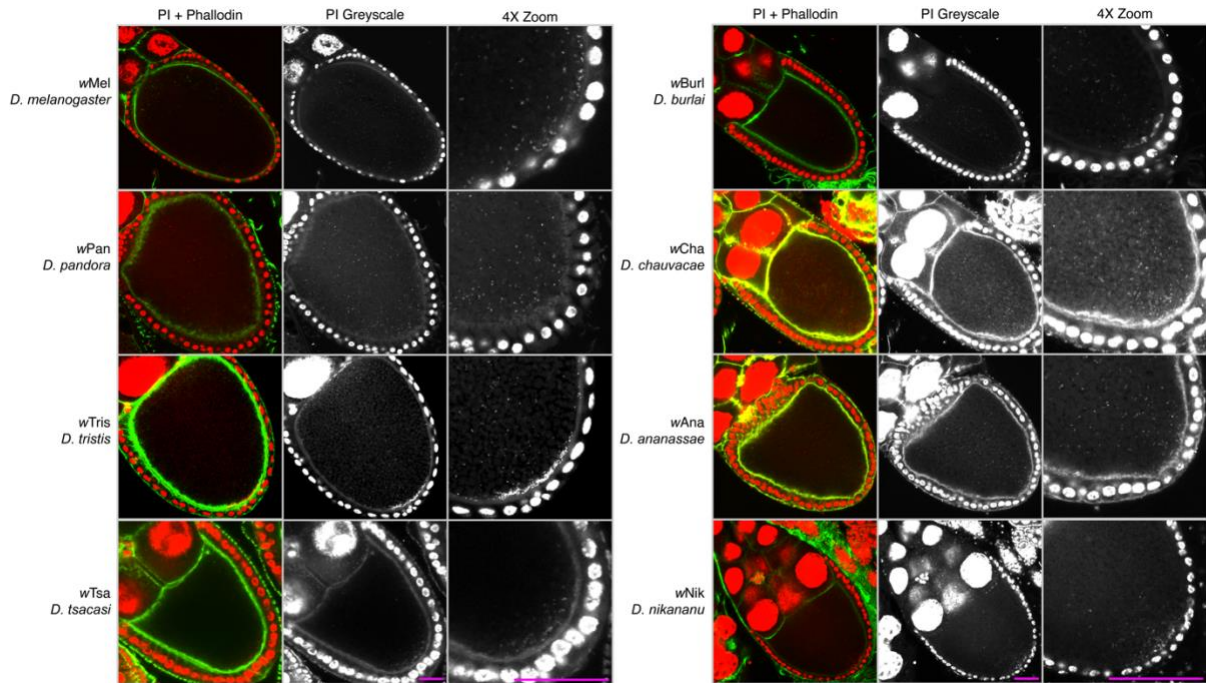



**B**

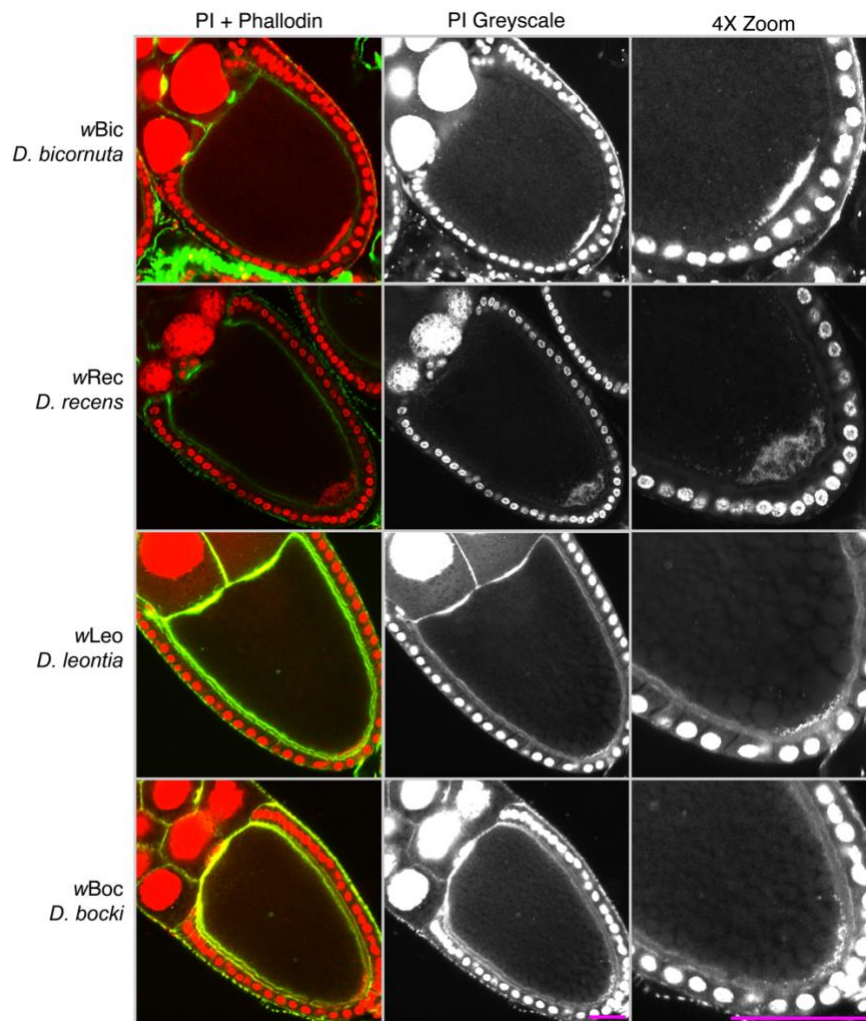

C

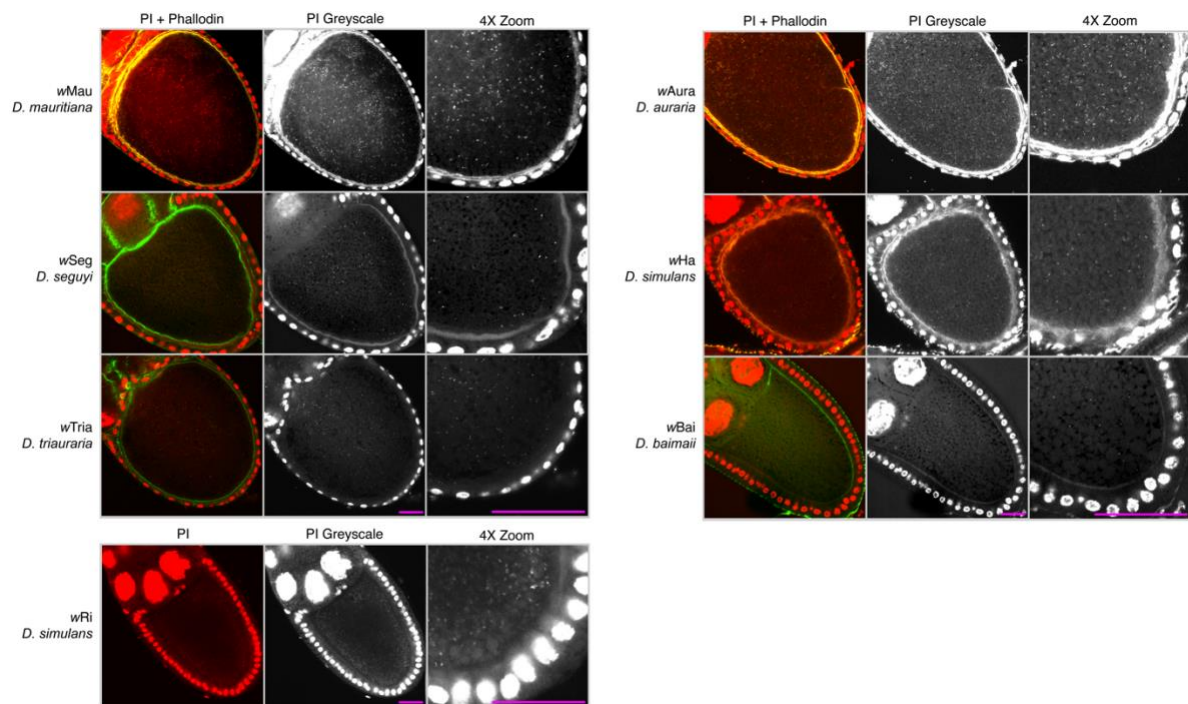



**Supplemental Figure 6.** Cellular *Wolbachia* abundance in stage 10 oocytes measured as *Wolbachia* fluorescence due to propidium iodide (CTCF). Points are color coded by *Wolbachia* localization class (Posteriorly Clumped, Posteriorly Localized, Dispersed), with unique shapes indicating each *Wolbachia* strain and host species. Asterisks indicate significant differences among groups based on one-way ANOVAs and Tukey comparisons using  $P$ -values  $<0.05$  adjusted for multiple comparisons. Above, a schematic is shown for fluorescent quantification of different regions of the oocyte using the PI greyscale channel: the whole oocyte, the posterior region, and the posterior cortex.

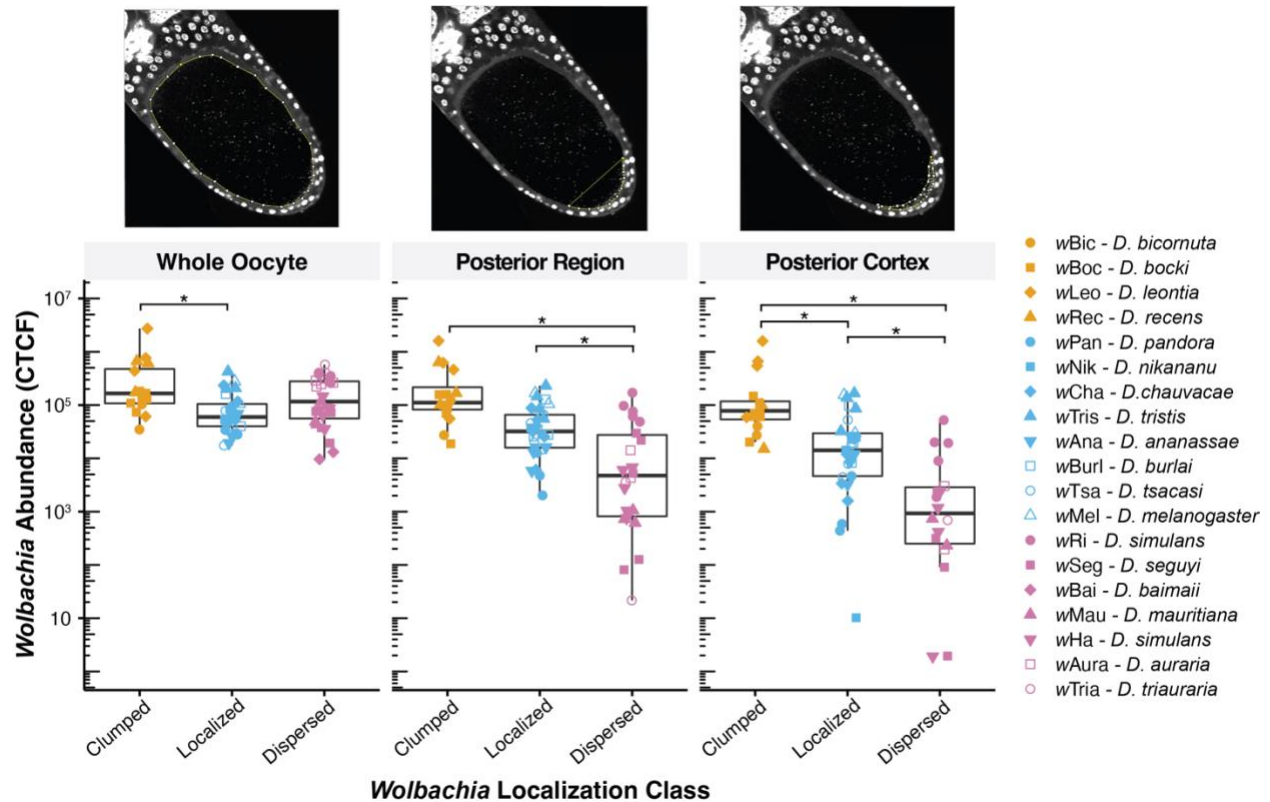

**Supplemental Figure 7.** Distribution of maximum likelihood estimates of  $\lambda$  from 1,000 bootstrap replicates based on the *Wolbachia* phylogram and *Wolbachia* abundance at the oocyte posterior cortex (log-transformed CTCF). The bootstrap analysis of our *Wolbachia* phylogram is shown to the left ( $N = 19$  *Wolbachia* strains). To the right are simulated phylogenies with an increasing number of *Wolbachia* strains included ( $N = 25, 50$ ). For simulated trees, character evolution was simulated with our  $\lambda$  estimate of 0.959 using the “sim.bdtree” and “sim.char” functions in the *Geiger* R package (Harmon et al. 2008). For each graph, fitted  $\lambda$  values for the original phylogeny are shown above with a vertical dashed line. Note that fitted  $\lambda$  values for the simulated phylogenies differ slightly from  $\lambda = 0.959$ , because “sim.char” uses a Brownian-motion model to simulate character evolution along the phylogeny. Below each graph, the mean estimate of  $\lambda$  from the 1,000 replicates ( $\bar{\lambda}$ ) is shown with associated 95% confidence intervals. Small phylogenies (e.g.,  $N = 19$ ) are likely to generate many near-zero  $\lambda$  values by chance, not necessarily because the phylogeny is unimportant for trait evolution (Boettiger et al. 2012). As the number of strains in our analysis increases ( $N = 25, 50$ ), bootstrapped estimates of  $\lambda$  cluster around the true  $\lambda$  value fitted to the original phylogeny.

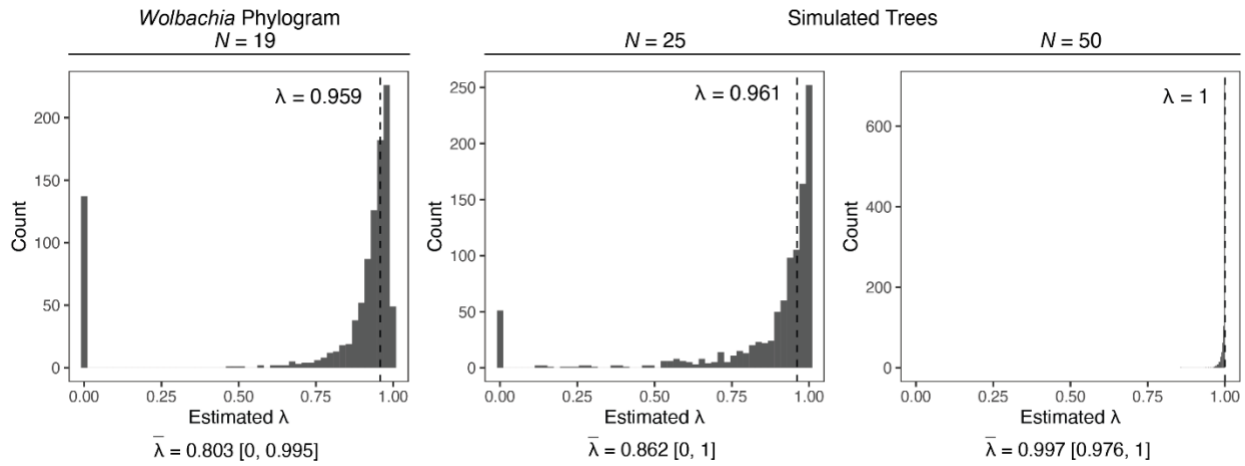

**Supplemental Figure 8.** Gene trees of *Wolbachia* surface proteins. All nodes have Bayesian posterior probabilities of >0.95 unless otherwise noted (see only *wspC*).

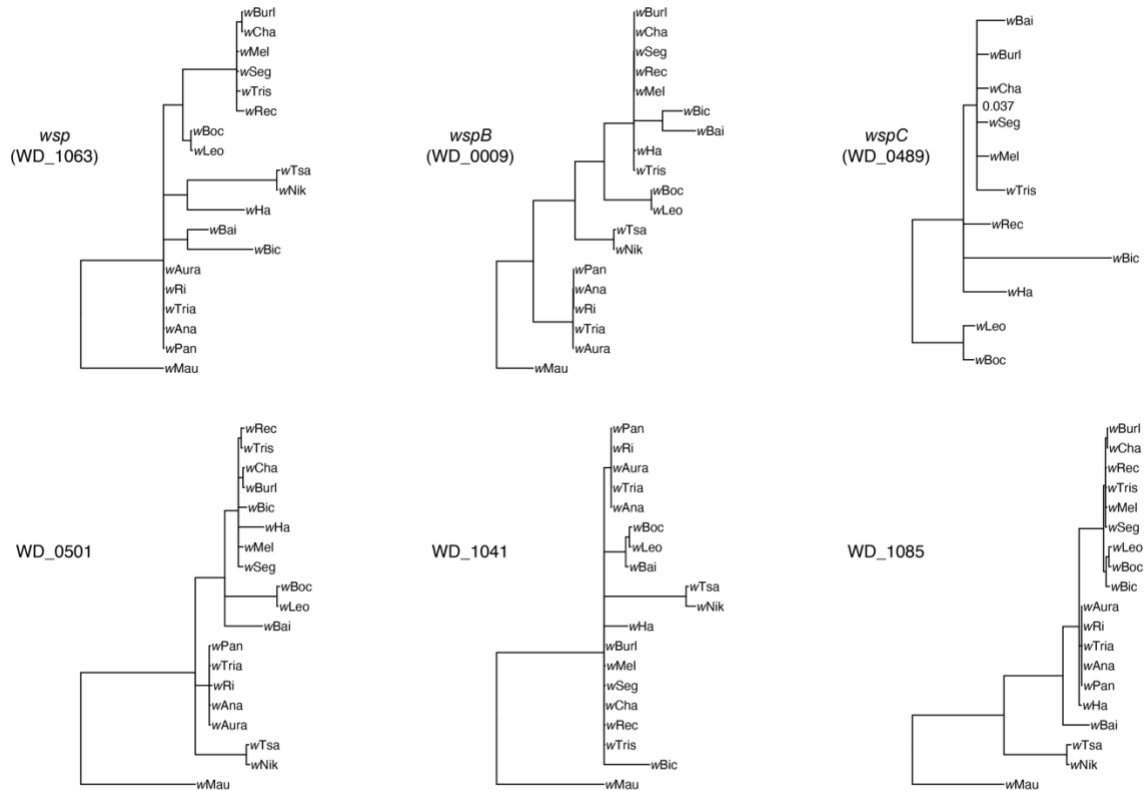

**Supplemental Figure 9.** To gain insight into WD\_0501 (RS0225/p44/Msp2) and WD\_1085 (RS04910/bamA) cellular function, we ectopically expressed these genes in yeast using a Galactose inducible promoter. Under normal growth conditions, ectopic expression of both genes inhibited growth, with WD\_1085 (RS04910/bamA) exhibiting a more pronounced inhibition. Growth inhibition of WD\_1085 was dramatically increased when the integrity of microtubules was compromised with the yeast placed in the *mad1* spindle assembly checkpoint background or the microtubules were compromised directly through the addition of benomyl. These results suggest that WD\_1085 may directly or indirectly interact with host microtubules.

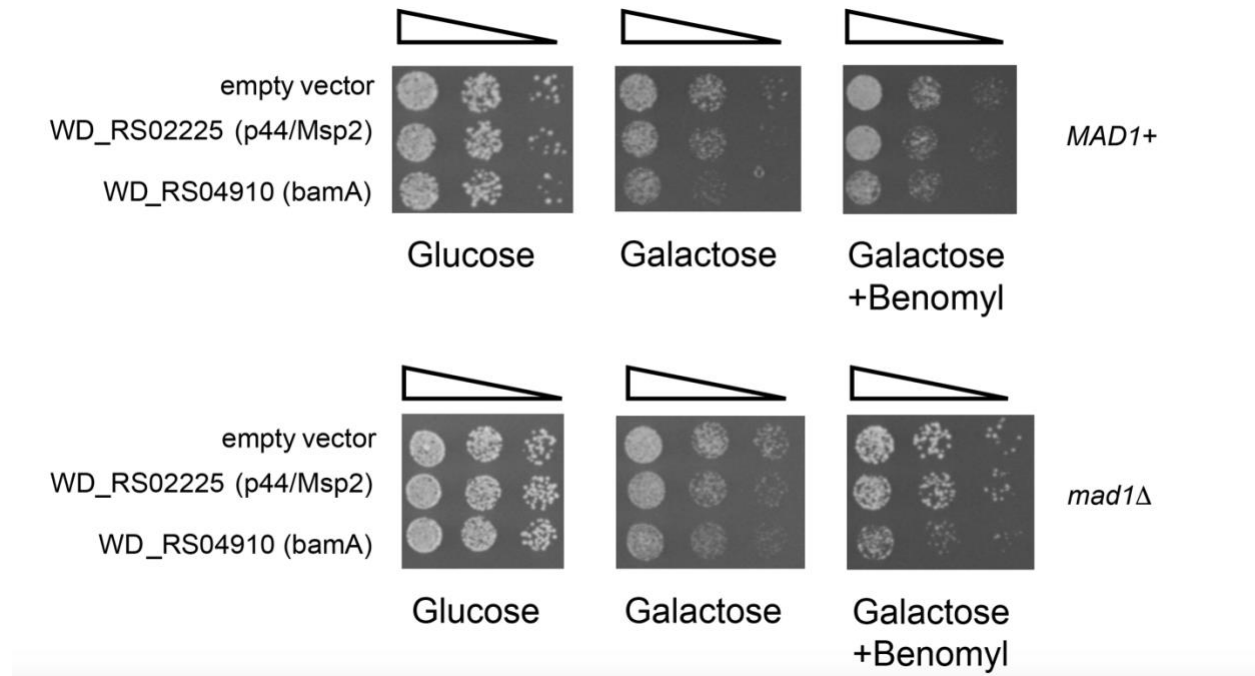

**Supplemental Figure 10.** Full amino acid alignment of *wspB* (WD\_0009) homologs in *wMel* and the *Wolbachia* strains with a putatively pseudogenized version of the surface protein. Stop codons are indicated by asterisks and insertions of varying length are indicated by “XXX”.

|                       |                                                              |     |
|-----------------------|--------------------------------------------------------------|-----|
| <u>wMel reference</u> | MISKKTLAVTAFALLLSQQSFASETEGFYFGSGYYGQYLNNTSVLKTSTTGKLNLSINDR | 60  |
| <u>wHa</u>            | MISKKTLAVTAFALLLSQQSFASETEGFYFGSRYYGQYLNNTSVLKTSTTGKLNLSINDR | 60  |
| <u>wBai</u>           | MISKKTLAVTALALLLSQQSFASETEGFYFGSGYYGQFFNGMGELKTSTTDIKNLSINDR | 60  |
| <u>wBoc</u>           | MISKKTLAVTALALLLSQQSFASETEGFYFGSGYYGQFFNGMGELKTSTTDIKNLSINDR | 60  |
| <u>wLeo</u>           | MISKKTLAVTALALLLSQQSFASETEGFYFGSGYYGQFFNGMGELKTSTTDIKNLSINDR | 60  |
| <u>wBic</u>           | MISKKTLAVTAFALLLSQQSFASETEGFYFGSGYYGQYLNNTSVLKTSTTGKLNLSINDR | 60  |
| <u>wMel reference</u> | GAQNTGQSLSEYKGDYNPPFAANVAFGYTGELGNNSYRAELEGMYSSVKVD---NIGLT  | 117 |
| <u>wHa</u>            | GAQNTGQSLSEYKGDYNPLLQMWHLVTQENWVTTAIGLNWKGCIIL*KWI---ILV*Q   | 117 |
| <u>wBai</u>           | DAQNTKGQSLSEYKGDYNPPL-----VIQGNWVTTAIGLNWKGCIIL*KWI---ILV*Q  | 111 |
| <u>wBoc</u>           | GAQNTKGQSLSKYKGDYNPPFAANVALGYTGELGNNSCRAELEGMYSSVKVDXXXILV*Q | 120 |
| <u>wLeo</u>           | GAQNTKGQSLSKYKGDYNPPFAANVALGYTGELGNNSCRAELEGMYSSVKVDXXXILV*Q | 120 |
| <u>wBic</u>           | GAQNTGQSLSEYKGDYNPPFAANVAFGYTGELGNNSYRAELEGMYSSVKVD---NIGLT  | 117 |
| <u>wMel reference</u> | SSQITVSYLKETGEDDPDKETYLYSAAVSHDQIENISVMANVYHHWKSDFSFSPYVGIGI | 177 |
| <u>wHa</u>            | VAK*LFHT*RRLVRILIKKLISIVLQLVMTKLRTYL*WQMFIIIGKVTVSLFLLTLVLGS | 177 |
| <u>wBai</u>           | VAK*LFHI*RTLVRMLIKKLISIVLQLIMTKLRTYL*WQMFIIIGKVTVSLFLLTLVLES | 171 |
| <u>wBoc</u>           | VVK*LFHT*RTLVRMLVKKLVSIVLQLIMTKLKTCL*WQMFIIIGRVTVSLFLLMLGLES | 180 |
| <u>wLeo</u>           | VVK*LFHT*RTLVRMLVKKLVSIVLQLIMTKLKTCL*WQMFIIIGRVTVSLFLLMLGLES | 180 |
| <u>wBic</u>           | SSQITVSYLKETGEDDPNKETYLYSAAVSHDQIENISVMANVYHNWKSDFSFSPYVGIGI | 177 |
| <u>wMel reference</u> | GATRMTMFEKPSIRPAGQLKAGFDYRINEDVN---MHIGYRGFGAIGSDIKLTAKRLGQV | 234 |
| <u>wHa</u>            | VQQE*RCLKNRQ*DPQVN*KLALTIA*TKM*I---CISDIEVLVLLVAILSLQQKG*DKW | 234 |
| <u>wBai</u>           | VQQE*RCLKNRQ*DPQVK*KLALTIT*TKM*I---CISDIEVLVLLVAILSLQQKS*DKW | 228 |
| <u>wBoc</u>           | VQQE*QCLKNRQ*DPQVN*KLALIIT*TKM*I---CISDIEVLVLLVLLVMVLNLQRM   | 237 |
| <u>wLeo</u>           | VQQE*QCLKNRQ*DPQVN*KLALIIT*TKM*I---CISDIEVLVLLVLLVMVLNLQRM   | 237 |
| <u>wBic</u>           | GATRMTMFEKPSIRPAGQLKAGFDYRINEDV*XXXCISDIEVLVLLVAILSLQQKG*DKW | 237 |
| <u>wMel reference</u> | VDDPNNDKKKK-----LNPSSGSKVTEEINIGNQLFHTHGIEAGLTFHFASKA        | 282 |
| <u>wHa</u>            | *TTLIMIKKRS-----LILAQVAK*LRK*I*VINYFIHTV*RLVLLSILPAKL        | 282 |
| <u>wBai</u>           | *TTLIMIKKRS-----LILAQVAKYSISHNSPNRS*EGRINSTTKGFE*RVN-        | 275 |
| <u>wBoc</u>           | LEKL*MILITGIKRSMLIRVNQQMQQKKI*I*VIHRFTHTV*RLALLSTLPAKL       | 291 |
| <u>wLeo</u>           | LEKL*MILITGIKRSMLIRVNQQMQQKKI*I*VIHRFTHTV*RLALLSTLPAKL       | 291 |
| <u>wBic</u>           | *TTLIMIKKRS-----LILAQVAKYSTSRNSPNRIRYVIMAMVEQ*HIMICSD        | 285 |

**Supplemental Figure 11.** Predicted *Wolbachia* surface proteins WD\_1063 (*wsp*/RS04815), WD\_0009 (*wspB*/RS00060), and WD\_0489 (*wspC*/RS06475) were assayed for their effect on eukaryotic cellular processes through ectopic expression in yeast. Note that galactose induction of gene expression of *wspC* kills the cells, while expression of *wsp* and *wspB* inhibits growth.

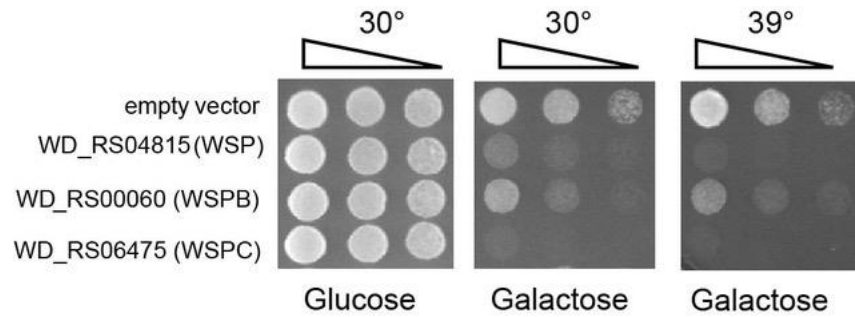



**Supplemental Table 1.** Scaffold count, N50, and total assembly size of each new *Wolbachia* assembly.

| Host species        | <i>Wolbachia</i> | Scaffold Count | N50   | Total Assembly Size |
|---------------------|------------------|----------------|-------|---------------------|
| <i>D. baimaii</i>   | wBai             | 209            | 9004  | 1135209             |
| <i>D. bicornuta</i> | wBic             | 140            | 16267 | 1192611             |
| <i>D. bocki</i>     | wBoc             | 227            | 7115  | 1090928             |
| <i>D. burlai</i>    | wBurl            | 128            | 20905 | 1248003             |
| <i>D. chauvacae</i> | wCha             | 406            | 4802  | 1300201             |
| <i>D. tsacasi</i>   | wTsa             | 59             | 29597 | 1132109             |
| <i>D. nikananu</i>  | wNik             | 83             | 22663 | 1257108             |
| <i>D. seguyi</i>    | wSeg             | 201            | 8880  | 1174927             |
| <i>D. tristis</i>   | wTris            | 114            | 20171 | 1264866             |
| <i>D. leontia</i>   | wLeo             | 186            | 9149  | 1096851             |

**Supplemental Table 2.** Summary of domain annotation results from HHPred for WD\_1085 and WD\_0501.

| Query name | Number | Hit          | Name                                                                                                                     | Prob  | E-value  | Aligned cols | Target length | Query residues | Domain length |
|------------|--------|--------------|--------------------------------------------------------------------------------------------------------------------------|-------|----------|--------------|---------------|----------------|---------------|
| WD_1085    | 1      | COG4775      | BamA; Outer membrane protein assembly factor BamA [Cell wall/membrane/envelope biogenesis]                               | 100   | 3.10E-63 | 733          | 766           | 25-778         | 753           |
| WD_1085    | 2      | COG0729      | TamA; Outer membrane translocation and assembly module TamA [Cell wall/membrane/envelope biogenesis]                     | 100   | 2.00E-42 | 505          | 594           | 227-778        | 551           |
| WD_1085    | 3      | COG2831      | FhaC; Hemolysin activation/secretion protein [Intracellular trafficking, secretion, and vesicular transport]             | 100   | 2.90E-39 | 490          | 554           | 237-778        | 541           |
| WD_1085    | 4      | KOG2602      | Predicted cell surface protein homologous to bacterial outer membrane proteins [General function prediction only]        | 100   | 1.00E-31 | 433          | 457           | 315-778        | 463           |
| WD_1085    | 5      | PF19143.3    | Omp85_2 ; OMP85 superfamily                                                                                              | 99.94 | 2.60E-23 | 308          | 360           | 419-778        | 359           |
| WD_1085    | 6      | COG4775      | BamA; Outer membrane protein assembly factor BamA [Cell wall/membrane/envelope biogenesis]                               | 99.93 | 6.20E-21 | 569          | 766           | 25-637         | 612           |
| WD_1085    | 7      | COG4775      | BamA; Outer membrane protein assembly factor BamA [Cell wall/membrane/envelope biogenesis]                               | 99.92 | 2.80E-22 | 310          | 766           | 93-433         | 340           |
| WD_1085    | 8      | PF01103.26   | Omp85 ; Omp85 superfamily domain                                                                                         | 99.92 | 5.40E-22 | 306          | 424           | 454-778        | 324           |
| WD_1085    | 9      | PF03865.16   | ShlB ; Haemolysin secretion/activation protein ShlB/FhaC/HecB                                                            | 99.87 | 2.10E-19 | 285          | 310           | 416-742        | 326           |
| WD_1085    | 10     | COG4775      | BamA; Outer membrane protein assembly factor BamA [Cell wall/membrane/envelope biogenesis]                               | 99.61 | 2.50E-13 | 232          | 766           | 24-275         | 251           |
| WD_0501    | 1      | PF05736.14   | OprF ; OprF membrane domain                                                                                              | 99.78 | 3.00E-16 | 134          | 186           | 159-303        | 144           |
| WD_0501    | 2      | COG3637      | LomR; Opacity protein and related surface antigens [Cell wall/membrane/envelope biogenesis]                              | 99.75 | 1.20E-15 | 135          | 199           | 166-303        | 137           |
| WD_0501    | 3      | COG3047      | OmpW; Outer membrane protein W [Cell wall/membrane/envelope biogenesis]                                                  | 99.74 | 1.80E-15 | 144          | 213           | 159-303        | 144           |
| WD_0501    | 4      | PF06316.14   | Ail_Lom ; Enterobacterial Ail/Lom protein                                                                                | 99.7  | 1.20E-14 | 179          | 199           | 3-303          | 300           |
| WD_0501    | 5      | PF19573.2    | DUF6089 ; Domain of unknown function (DUF6089)                                                                           | 99.67 | 3.60E-14 | 186          | 226           | 4-303          | 299           |
| WD_0501    | 6      | PF13505.9    | OMP_b-brl ; Outer membrane protein beta-barrel domain                                                                    | 99.65 | 8.40E-14 | 175          | 209           | 7-303          | 296           |
| WD_0501    | 7      | SCOP_d1p4ta_ | f.4.1.1 (A:) Outer membrane protein NspA {Neisseria meningitidis [TaxId: 487]}   CLASS: Membrane and cell surface protei | 99.64 | 2.10E-13 | 154          | 155           | 95-303         | 208           |
| WD_0501    | 8      | PF01389.20   | OmpA_membrane ; OmpA-like transmembrane domain                                                                           | 99.62 | 2.60E-13 | 173          | 202           | 95-303         | 208           |
| WD_0501    | 9      | SCOP_d1qjpa_ | f.4.1.1 (A:) Outer membrane protein A (OMPA) transmembrane domain {Escherichia coli [TaxId: 562]}   CLASS: Membrane and  | 99.61 | 4.60E-13 | 167          | 171           | 94-303         | 209           |
| WD_0501    | 10     | PF03922.17   | OmpW ; OmpW family                                                                                                       | 99.6  | 3.40E-13 | 164          | 201           | 96-303         | 207           |

**Supplemental Table 3.** Summary of results for *Wolbachia* surface proteins.

| Gene                      | Description                                    | Significant<br>Phylogenetic<br>Signal | Ectopic Expression                                                       |
|---------------------------|------------------------------------------------|---------------------------------------|--------------------------------------------------------------------------|
| WD_1063<br>(wsp/RS04815)  | surface antigen Wsp                            | None                                  | Growth inhibition                                                        |
| WD_0009<br>(wspB/RS00060) | surface antigen Wsp<br>paralog                 | None                                  | Growth inhibition                                                        |
| WD_0489<br>(wspC/RS06475) | surface antigen, Wsp<br>paralog                | None                                  | Lethality                                                                |
| WD_1085<br>(RS04910)      | outer membrane protein<br>assembly factor BamA | Oocyte posterior,<br>posterior cortex | Growth inhibition and sensitive to<br>microtubule checkpoints/inhibitors |
| WD_0501<br>(RS0225)       | P44/Msp2 family outer<br>membrane protein      | Oocyte posterior                      | Slight growth inhibition                                                 |
| WD_1041<br>(RS04710)      | peptidase M2                                   | None                                  | Not tested                                                               |

**Supplemental Table 4.** Estimates of phylogenetic signal (Pagel's  $\lambda$ ) with 95% confidence intervals (CI) for *Wolbachia* surface proteins.

| Locus                   | Whole Oocyte |          |          |          | Posterior |          |          |          | Posterior Cortex |          |          |          |
|-------------------------|--------------|----------|----------|----------|-----------|----------|----------|----------|------------------|----------|----------|----------|
|                         | $\lambda$    | Lower CI | Upper CI | <i>P</i> | $\lambda$ | Lower CI | Upper CI | <i>P</i> | $\lambda$        | Lower CI | Upper CI | <i>P</i> |
| WD_1063 ( <i>wsp</i> )  | 0.000        | 0.000    | 0.578    | 1.000    | 0.945     | 0.000    | 0.993    | 0.071    | 0.000            | 0.000    | 0.633    | 1.000    |
| WD_0009 ( <i>wspB</i> ) | 0.000        | 0.000    | 0.401    | 1.000    | 0.000     | 0.000    | 0.374    | 1.000    | 0.279            | 0.000    | 0.720    | 0.655    |
| WD_0489 ( <i>wspC</i> ) | 0.210        | 0.000    | 0.947    | 0.659    | 0.000     | 0.000    | 0.845    | 1.000    | 0.000            | 0.000    | 0.811    | 1.000    |
| WD_0501                 | 0.000        | 0.000    | 0.597    | 1.000    | 0.992     | 0.521    | 1.000    | 0.022    | 0.000            | 0.000    | 0.536    | 1.000    |
| WD_1041                 | 0.000        | 0.000    | 0.692    | 1.000    | 0.000     | 0.000    | 0.555    | 1.000    | 0.000            | 0.000    | 0.484    | 1.000    |
| WD_1085                 | 0.000        | 0.000    | 0.553    | 1.000    | 0.974     | 0.000    | 0.998    | 0.001    | 0.942            | 0.000    | 0.994    | 0.028    |
